# Supplementary material for: Intra-molecular magnetic exchange interaction in the tripyridinium bis[tetrachloroferrate(iii)] chloride molecular magnet: a broken symmetry-DFT study
Source: Royal Society of Chemistry journal article supplement (doi:10.1039/c5cp02770e), 2015-01-01
Supplement: c5cp02770e1.pdf [file c5cp02770e1.pdf]

---

Electronic Supplementary Information for PCCP article

## **Intra-molecular magnetic exchange interaction in tripyridinium bis[tetrachloroferrate(III)] chloride molecular magnet: A Broken Symmetry-DFT study**

F. Baniasadi<sup>a</sup>, M.M. Tehranchi,<sup>a1</sup> M.B. Fathi<sup>b</sup>, N. Safari<sup>c</sup>

<sup>a</sup>Physics Department, Shahid Beheshti University, Tehran, Iran

<sup>b</sup>Physics Department, Kharazmi University, Tehran, Iran

<sup>c</sup>Chemistry Department, Faculty of Science, Shahid Beheshti University, Tehran, Iran

Prepared for *PCCP*

June 09/2015

### **Structure of molecule**

47

|    |               |               |               |
|----|---------------|---------------|---------------|
| Cl | 4.3505100000  | 0.1452260000  | -1.5019030000 |
| Fe | 5.9010630000  | -1.1226700000 | -0.6130520000 |
| Cl | 7.7378300000  | -0.8024470000 | -1.7160610000 |
| Cl | 4.9341690000  | -3.0724690000 | -0.3775880000 |
| Cl | 6.1878320000  | -0.3200860000 | 1.3899730000  |
| N  | -1.0522280000 | -1.7520140000 | 0.1242440000  |
| -C | 0.0403820000  | -1.0350510000 | -0.2479850000 |
| C  | 1.2104650000  | -1.7109330000 | -0.5740160000 |
| C  | 1.2386690000  | -3.1110560000 | -0.5049400000 |
| C  | 0.0862720000  | -3.8138390000 | -0.1233240000 |
| C  | -1.0681070000 | -3.1088510000 | 0.1904130000  |

---

<sup>1</sup> teranchi@sbu.ac.ir

|    |               |               |               |
|----|---------------|---------------|---------------|
| H  | -1.9127450000 | -1.2402060000 | 0.3797060000  |
| H  | -0.0575100000 | 0.0496350000  | -0.2708750000 |
| H  | 2.0867310000  | -1.1501650000 | -0.8752530000 |
| H  | 2.1568860000  | -3.6371220000 | -0.7397440000 |
| H  | 0.0807180000  | -4.8946800000 | -0.0686250000 |
| H  | -2.0101800000 | -3.5611290000 | 0.4767130000  |
| Cl | -0.1250660000 | 2.5054740000  | -0.3218310000 |
| N  | 2.3024850000  | 3.1273180000  | 1.2802640000  |
| C  | 3.5143600000  | 2.5457500000  | 1.1281410000  |
| C  | 4.5481940000  | 2.8759210000  | 2.0012290000  |
| C  | 4.3085220000  | 3.8096670000  | 3.0165750000  |
| C  | 3.0395190000  | 4.3954400000  | 3.1441570000  |
| C  | 2.0381240000  | 4.0303190000  | 2.2541170000  |
| H  | 1.5219700000  | 2.8739130000  | 0.6528310000  |
| H  | 3.6248320000  | 1.8343870000  | 0.3182990000  |
| H  | 5.5072760000  | 2.3879320000  | 1.8873140000  |
| H  | 5.1011580000  | 4.0758010000  | 3.7065710000  |
| H  | 2.8305410000  | 5.1167500000  | 3.9236830000  |
| H  | 1.0280410000  | 4.4169260000  | 2.2787190000  |
| N  | -4.5024130000 | 1.9412870000  | -1.5378000000 |
| C  | -3.3018180000 | 2.5376220000  | -1.3481030000 |
| C  | -2.9680760000 | 3.6481940000  | -2.1179140000 |
| C  | -3.8866820000 | 4.1261610000  | -3.0590370000 |
| C  | -5.1247500000 | 3.4824850000  | -3.2217860000 |
| C  | -5.4167380000 | 2.3715970000  | -2.4439980000 |
| H  | -4.7373040000 | 1.1070570000  | -0.9844220000 |
| H  | -2.6322610000 | 2.1198400000  | -0.6066500000 |
| H  | -1.9941130000 | 4.0950490000  | -1.9668920000 |
| H  | -3.6429420000 | 4.9899740000  | -3.6672230000 |

|    |               |               |               |
|----|---------------|---------------|---------------|
| H  | -5.8488260000 | 3.8336280000  | -3.9453590000 |
| H  | -6.3317670000 | 1.7982230000  | -2.5015680000 |
| Cl | -6.3523040000 | -0.6858050000 | -1.0534320000 |
| Fe | -5.5118810000 | -1.3983180000 | 0.8969840000  |
| Cl | -4.5641360000 | -3.3985530000 | 0.5126710000  |
| Cl | -3.6559840000 | -0.0843040000 | 0.9945020000  |
| Cl | -6.8802110000 | -0.6595190000 | 2.4579890000  |

**Simulation keywords:** To generate a BS state, keywords 'stable' and 'guess=mix' are used to stabilize the wave function and to find the BS state energy by generating symmetry broken initial guess in solution phase.
